# Supplementary material for: Proximate and underlying drivers of socio-hydrologic change in the upper Arkavathy watershed, India
Source: Copernicus journal article supplement (doi:10.5194/hess-2017-543), 2017-09-13

## SUPPLEMENT 2:

This supplement lists the underlying changes in economic and technology drivers in the milli-watersheds over time.

1970-1975

# Fig S2.1: Crops grown in the 1975

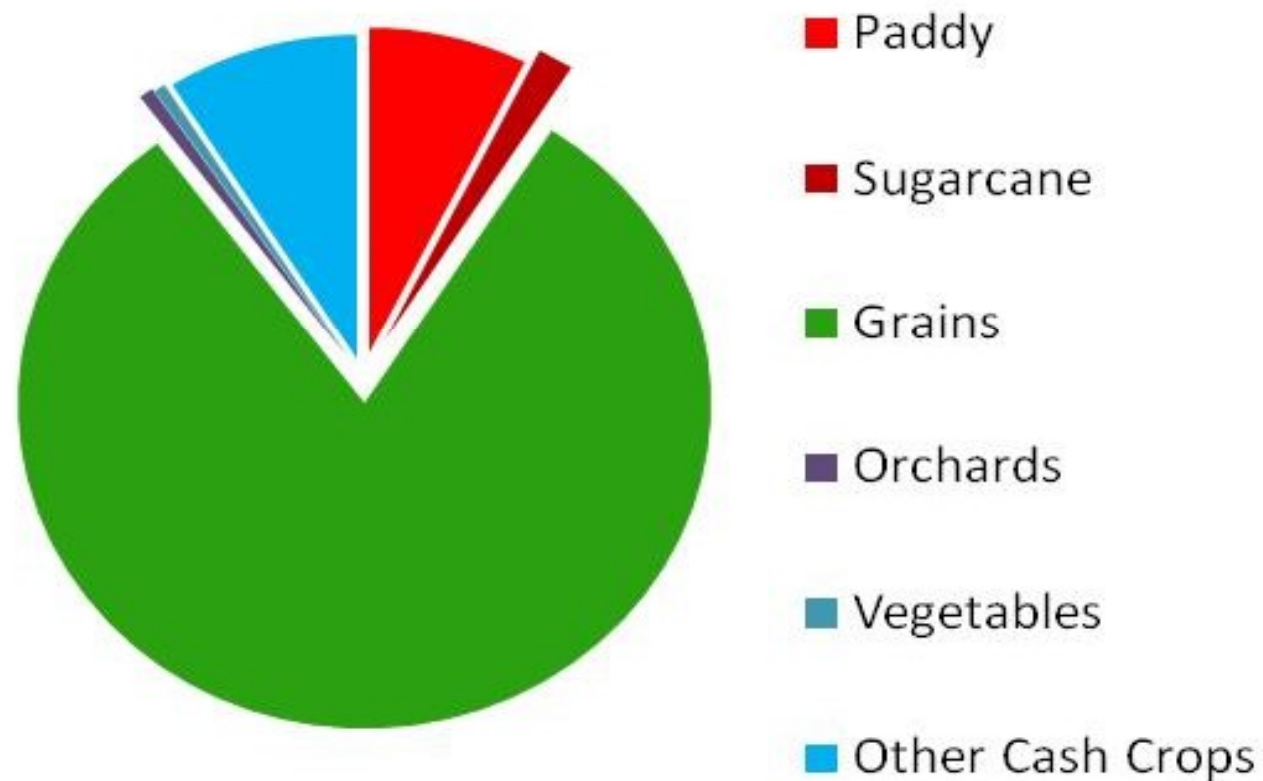

*Source: KA Annual Season Crop Report for Doddaballapur Taluk, in Bangalore Rural District*

# Fig S2.2: Sources of irrigation in 1975

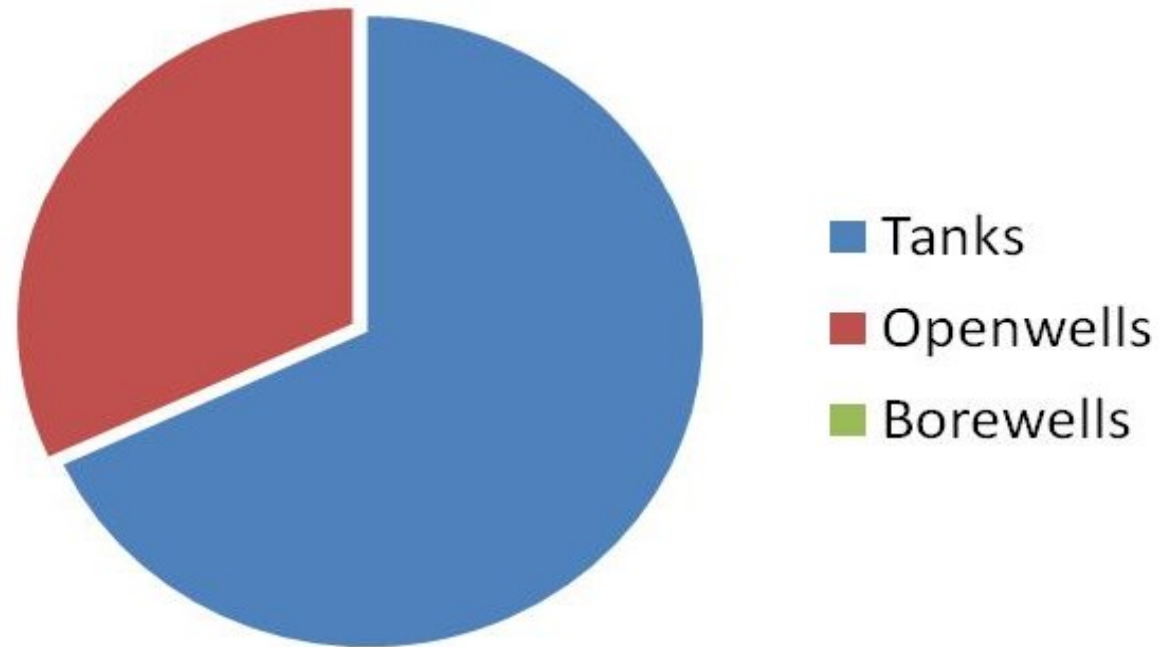

*Source: KA Annual Season Crop Report for Doddaballapur Taluk, in Bangalore Rural District*

1990-1995

# Fig S2.3: Crops grown in the 1995

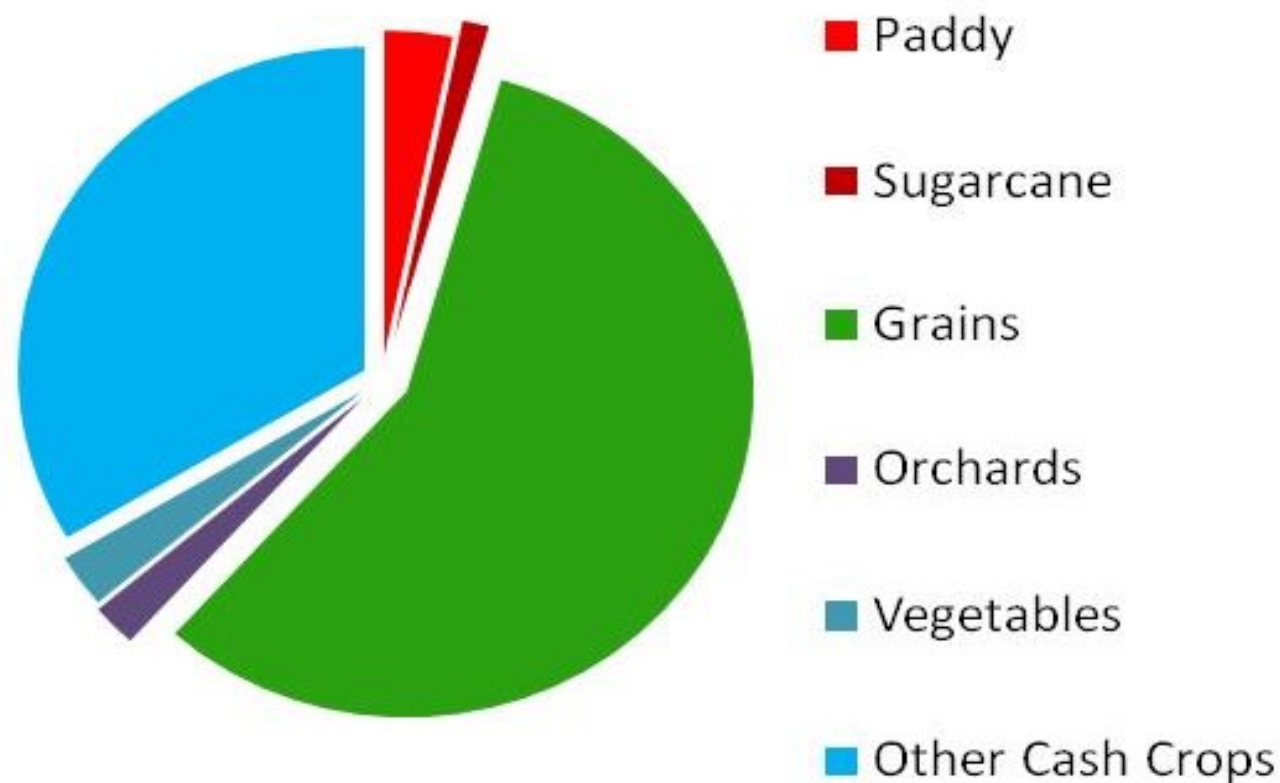

*Source: KA Annual Season Crop Report for Doddaballapur Taluk, in Bangalore Rural District*

# Fig S2.4: Sources of irrigation 1995

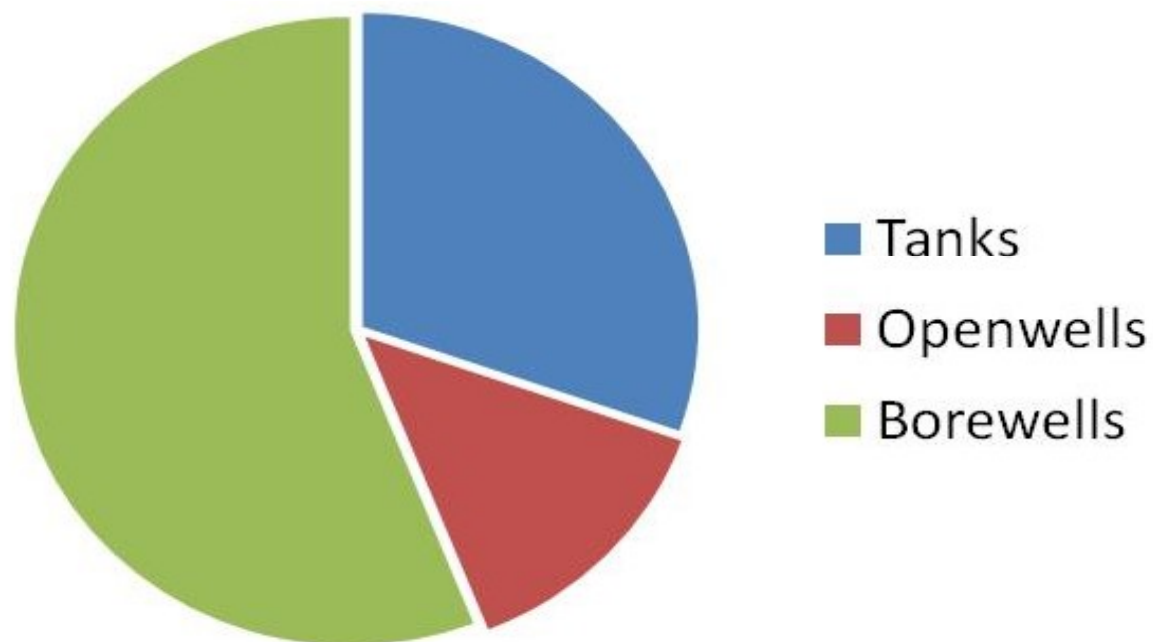

*Source: KA Annual Season Crop Report for Doddaballapur Taluk, in Bangalore Rural District*

# Fig 2.5: Labor availability in 1991

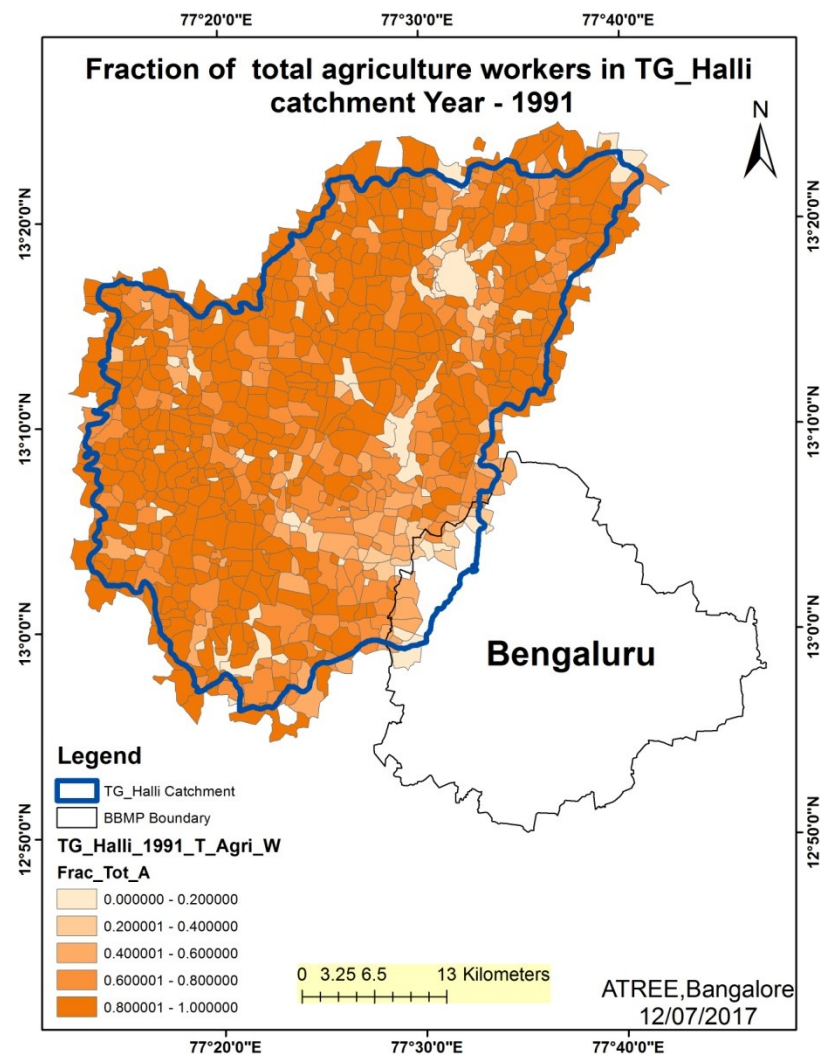

Agricultural workers as a fraction of the workforce.

Source: Census of India, 1991. Primary Census Abstracts



2010-2015

## Fig S2.6: Crops grown in 2015

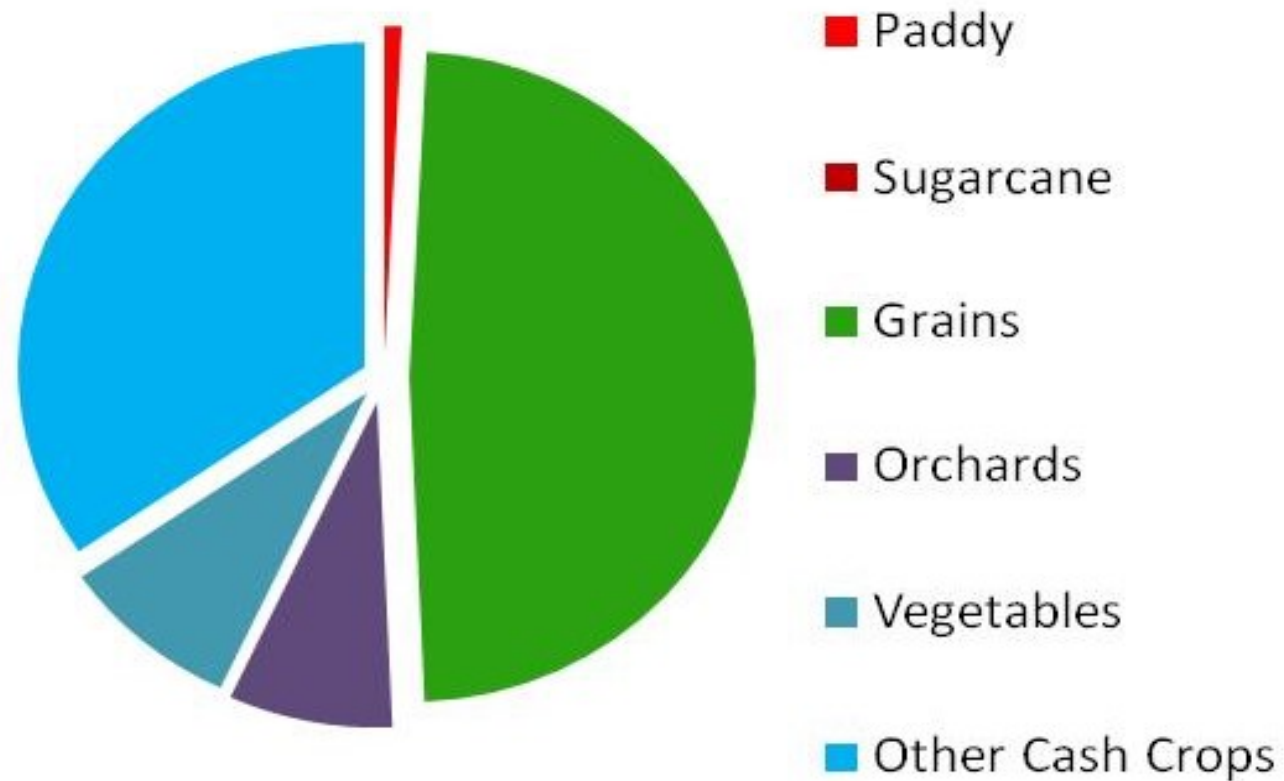

*Source: KA Annual Season Crop Report for Doddaballapur Taluk, in Bangalore Rural District*

# Fig S2.7: Sources of irrigation in 2015

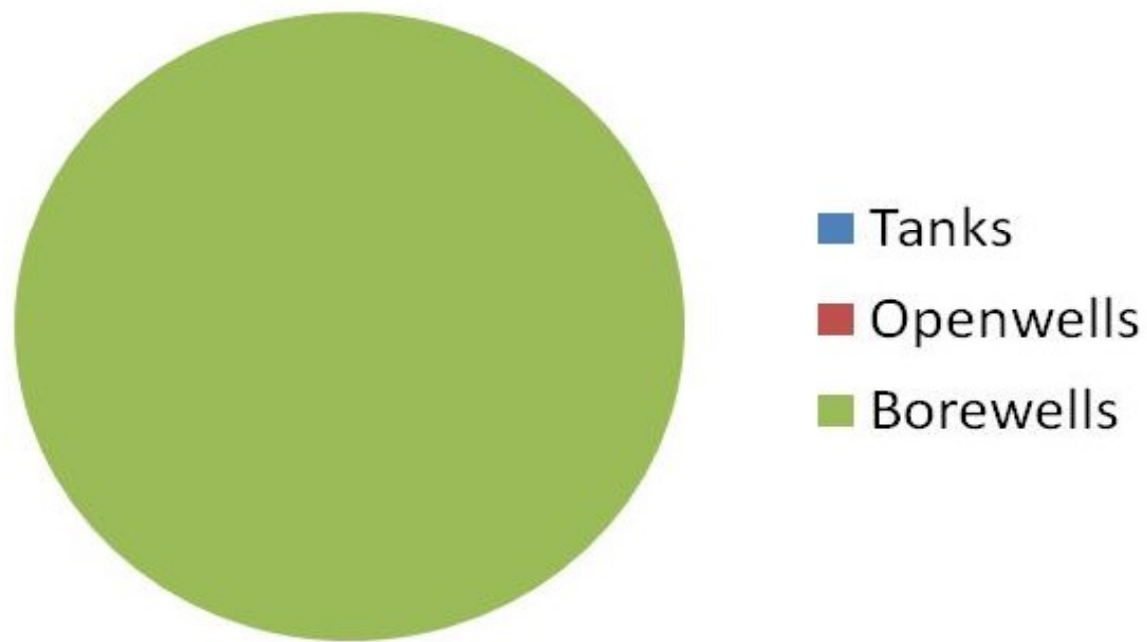

*Source: KA Annual Season Crop Report for Doddaballapur Taluk, in Bangalore Rural District*

# Fig S2.8: Labor availability in 2011

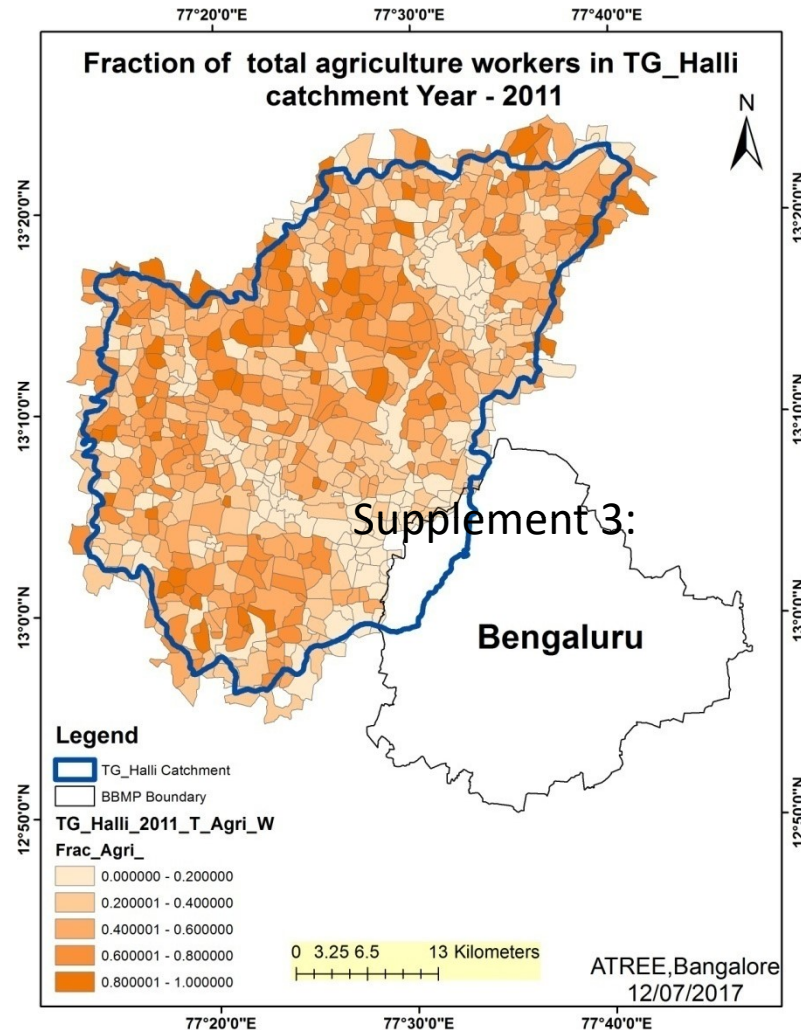

Agricultural workers as a fraction of the workforce.

Source: Census of India, 2011. Primary Census Abstracts

# Fig S2.9: Decadal change in cropping pattern of RF Farmers: 1993 to 2013

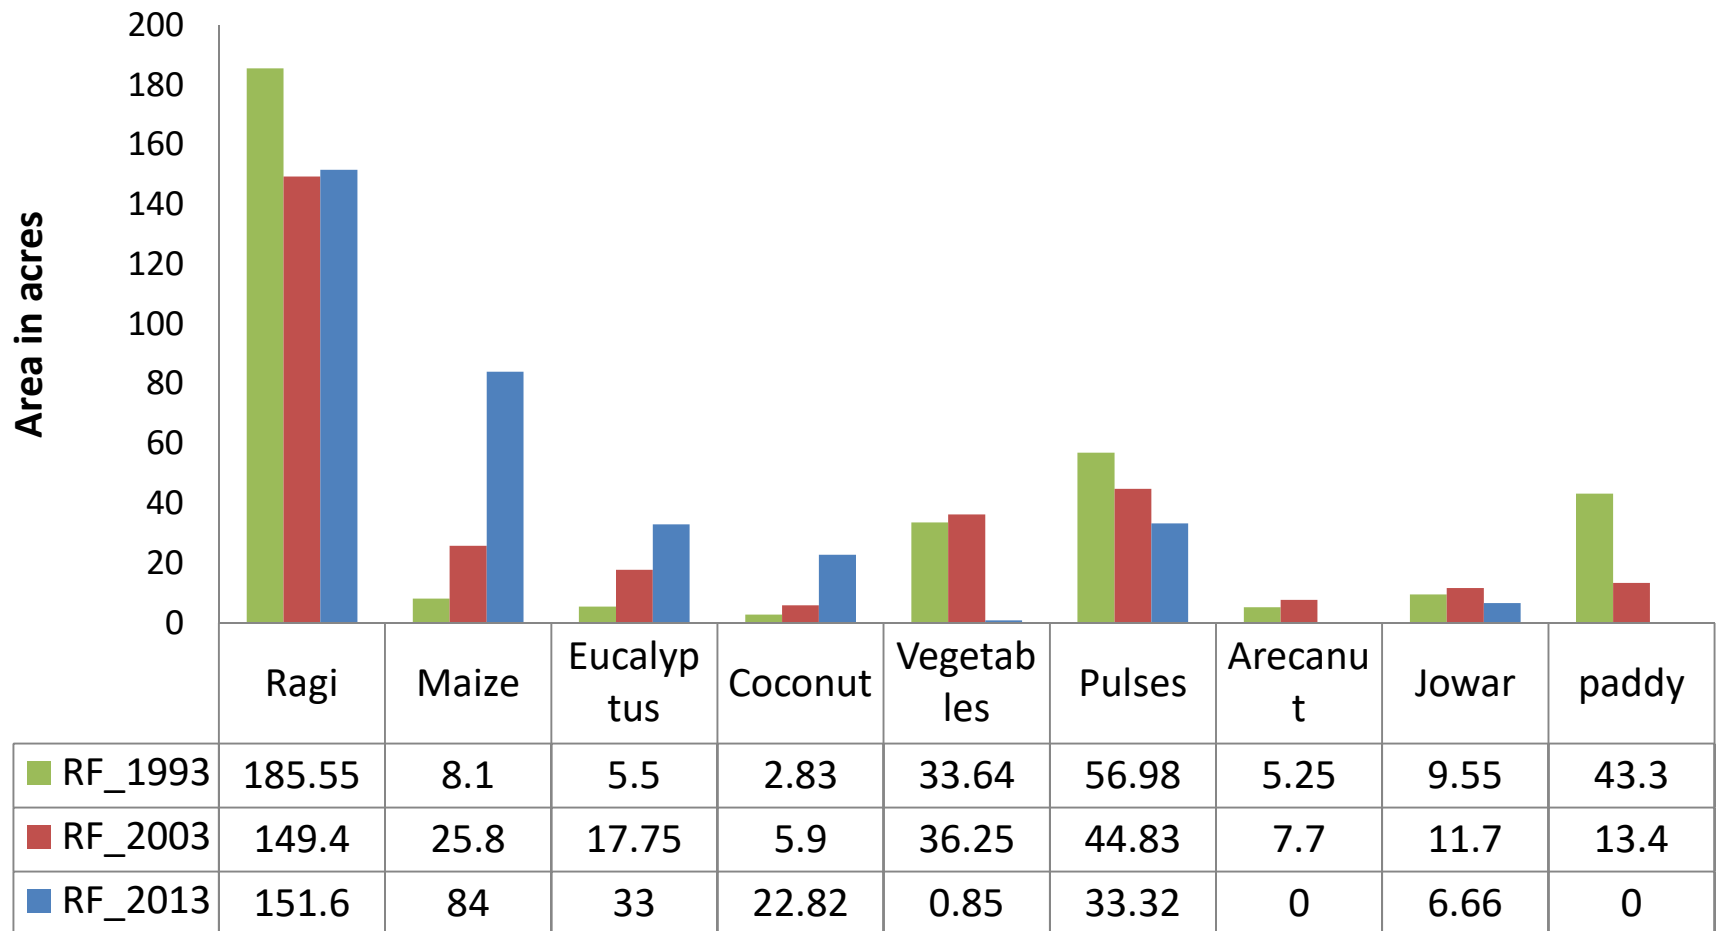

# Fig S2.10: Decadal change in cropping pattern of IRR Farmers: 1993 to 2013

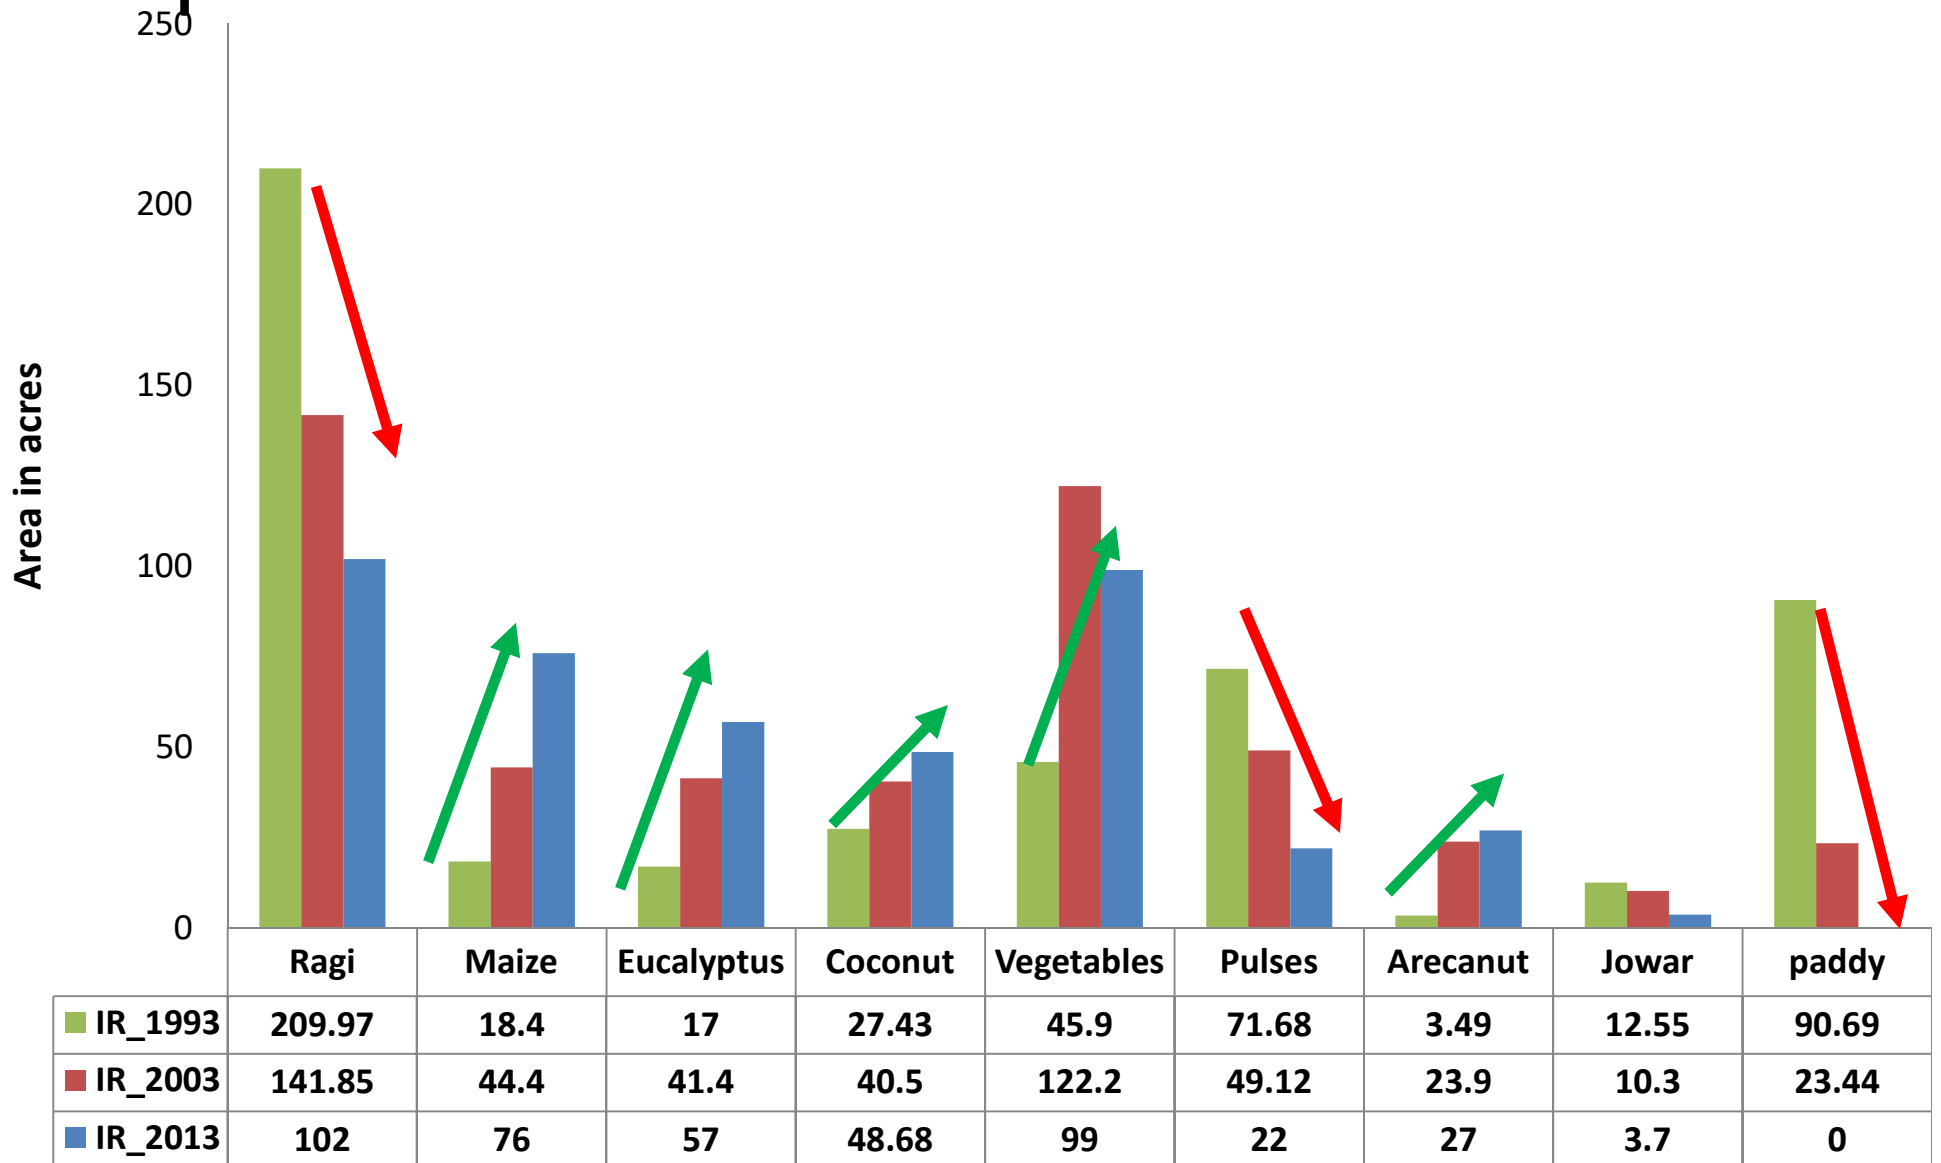

Supplement: Supplementary file 5 [file hess-2017-543-supplement.zip]
