# Supplementary material for: Proximate and underlying drivers of socio-hydrologic change in the upper Arkavathy watershed, India
Source: Copernicus journal article supplement (doi:10.5194/hess-2017-543), 2017-09-13

## **SUPPLEMENT 4:**

This supplement shows the locations  
of the observed and instrumented  
check dams.

Fig S4.1 Check dam locations -

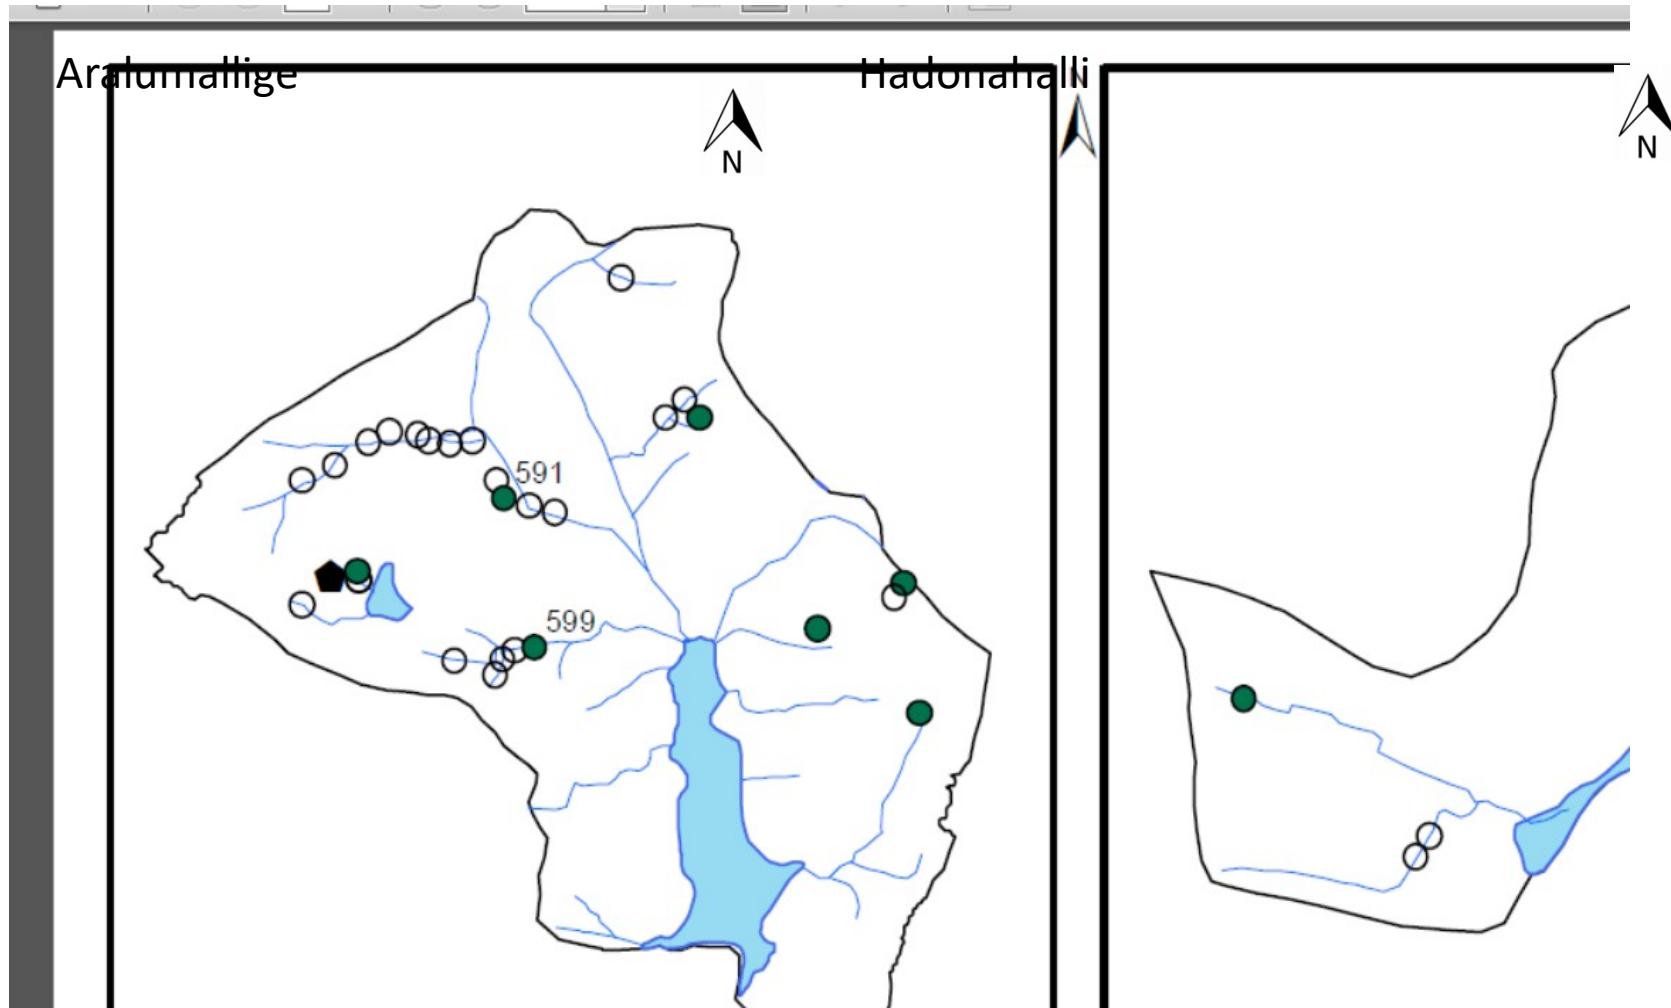

Fig S4.2 Check dam Picture

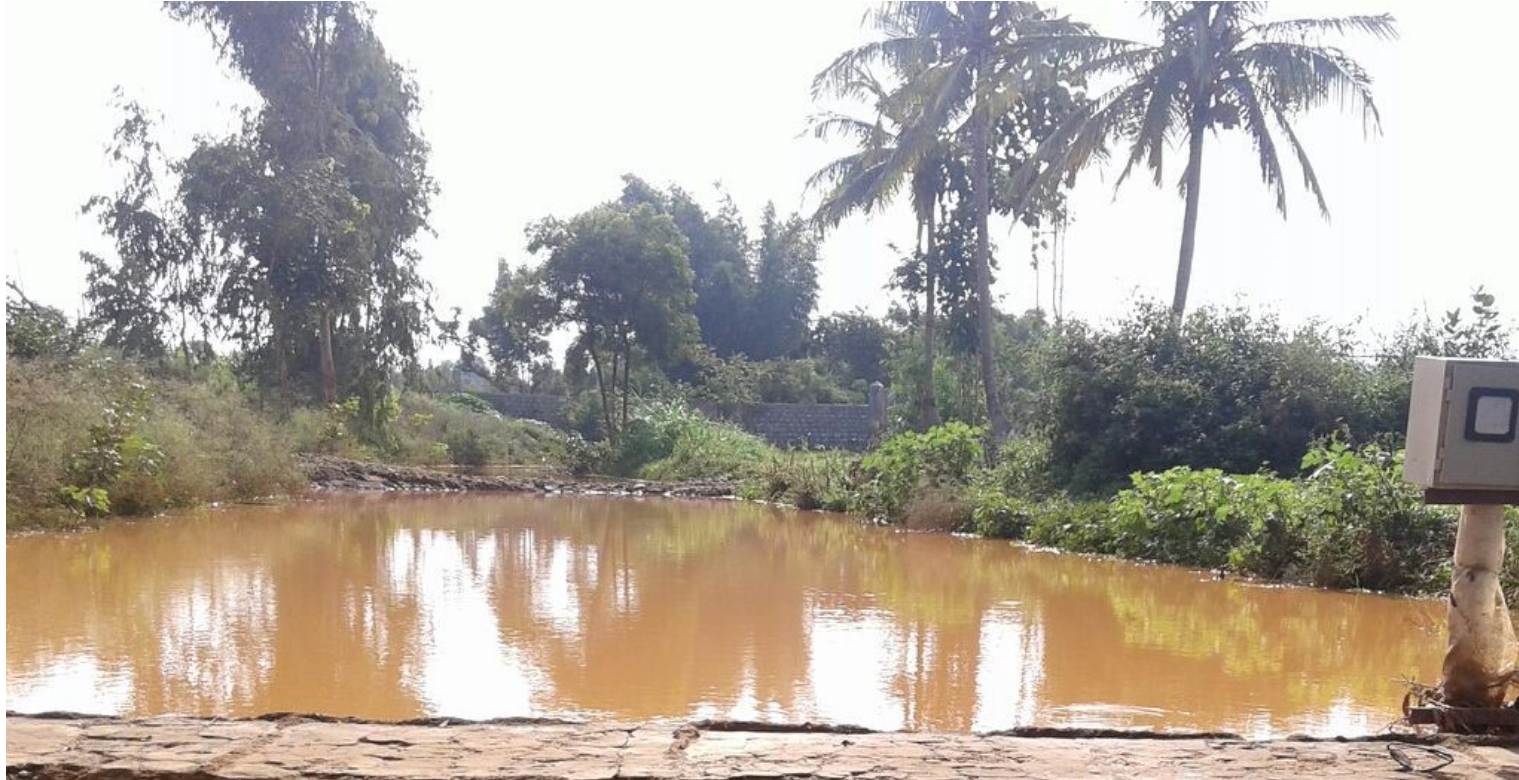

# Fig S4.3 Bathymetry of check dams

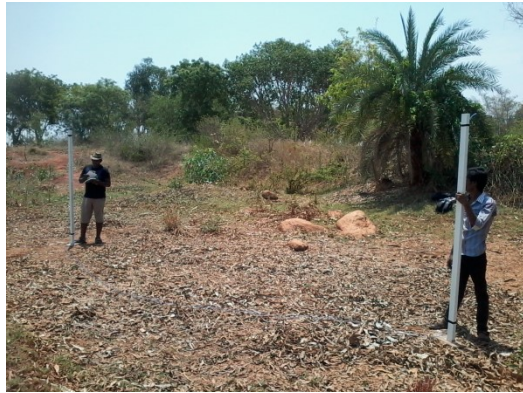

Check dam bathymetry was done using a simple dumpy instrument to obtain stage-area and stage-volume relationships.

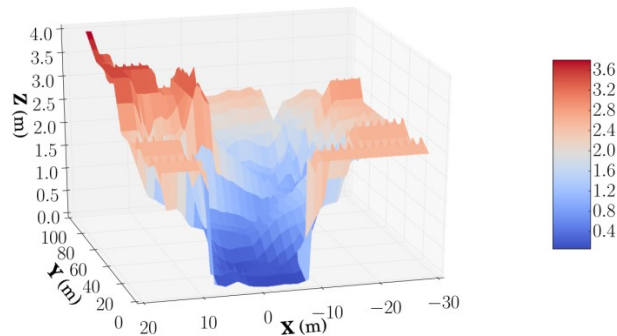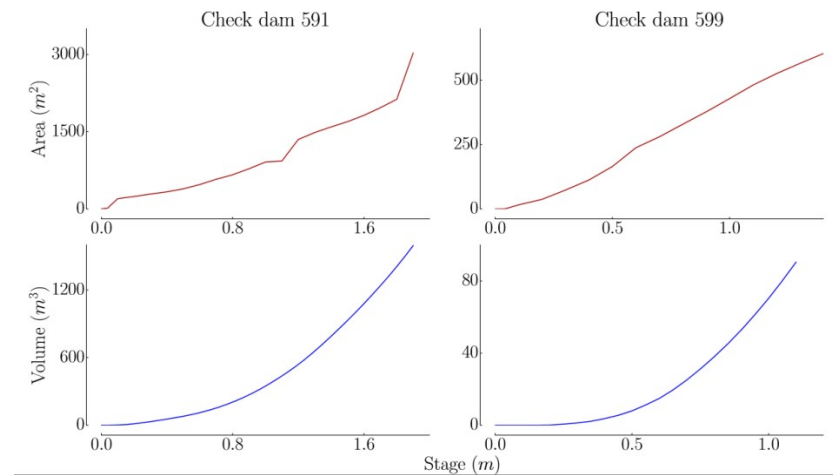

Source: Jeremaiah et al. 2015

# Fig S 4.4: Check Dam Survey

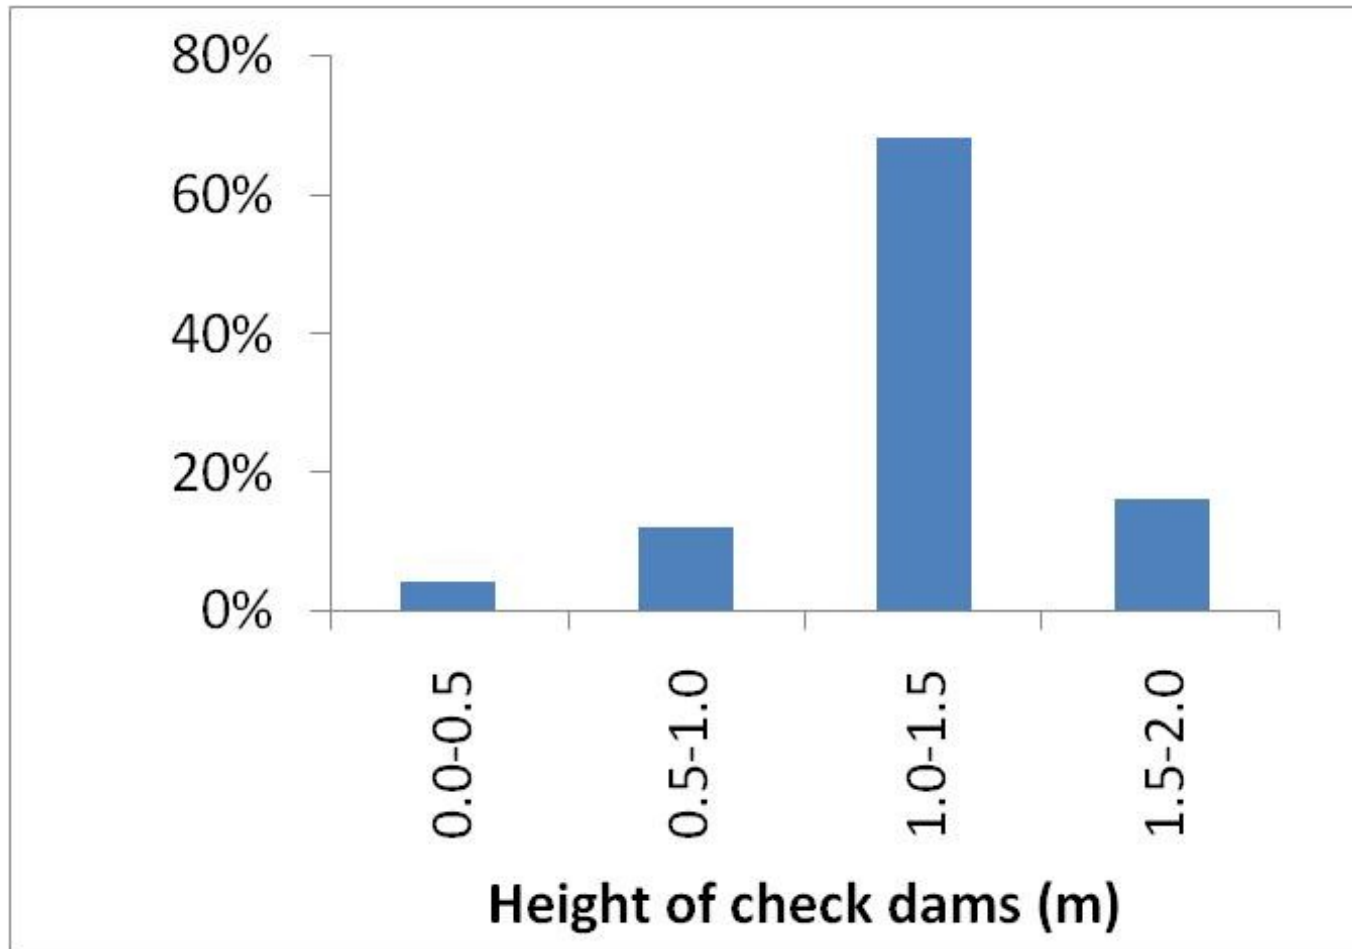



# Fig S4.5 Farm bund picture

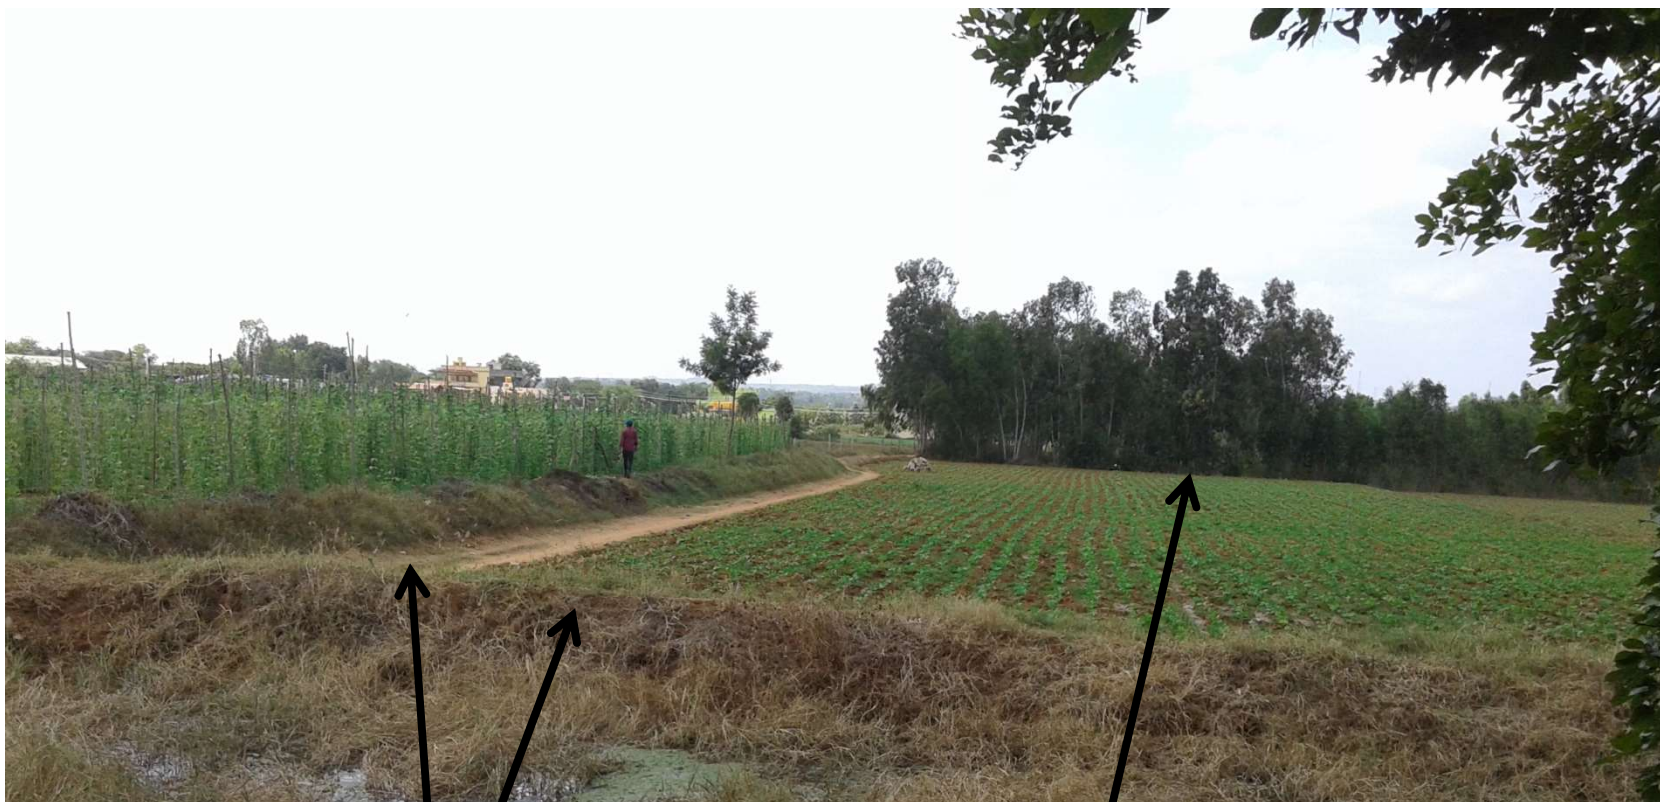

Most cropped plots have farm bunds to capture rainwater.

Eucalyptus plantations usually dont.

# Fig S4.6 More farm bund pictures

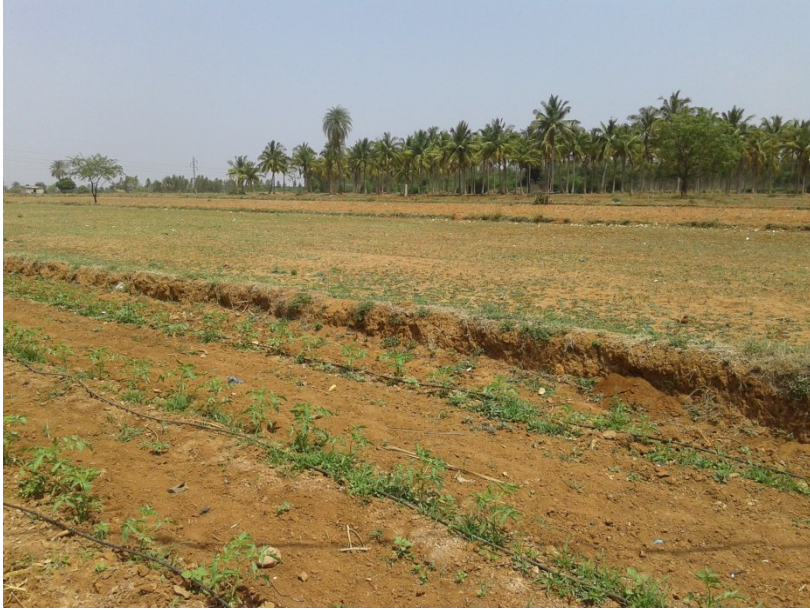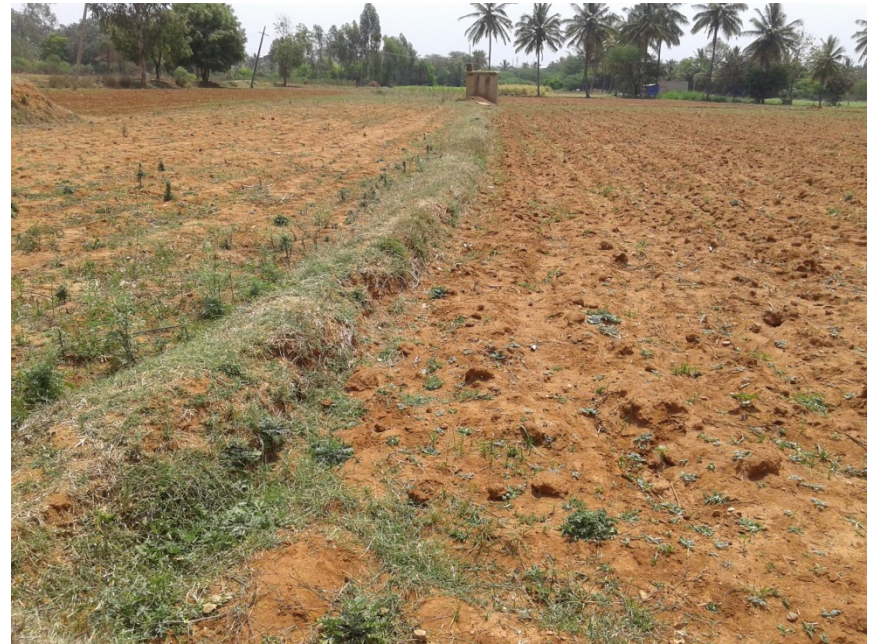

Supplement: Supplementary file 4 [file hess-2017-543-supplement.zip]
