# Supplementary material for: Proximate and underlying drivers of socio-hydrologic change in the upper Arkavathy watershed, India
Source: Copernicus journal article supplement (doi:10.5194/hess-2017-543), 2017-09-13
Supplement: Supplementary file [file hess-2017-543-AC3-supplement.pdf]

**Reviewer 3:**

Reviewer 3, Christopher Scott, has been largely supportive and has only asked for technical revisions. offered a number of specific comments including wording and punctuation changes. We thank the reviewer for his careful reading. These will be incorporated in the rewriting. In this response, we only address the substantive comments.

| <b>Comment</b>                                                                                                                                                                                                                                                                                                                                                                                                                                                                                                                   | <b>Response</b>                                                                                      |
|----------------------------------------------------------------------------------------------------------------------------------------------------------------------------------------------------------------------------------------------------------------------------------------------------------------------------------------------------------------------------------------------------------------------------------------------------------------------------------------------------------------------------------|------------------------------------------------------------------------------------------------------|
| This manuscript synthesizes new conceptual thinking, extensive empirical data collection, socio-hydrologic model development, consideration of drivers of changes, and makes well-substantiated conclusions. I am attaching an annotated version of the manuscript with detailed comments. My regrets for the delay beyond the requested date for referee comments. What makes this paper unique in the emerging field of socio-hydrology is the rigorous testing of hypotheses using meticulously collected multi-methods data. | We thank the reviewer for his supportive comments.                                                   |
| qualify this. entirely flood irrigation in 70s to what mix presently?. efficiency increases with area expansion contribute to water-resource depletion                                                                                                                                                                                                                                                                                                                                                                           | These figures will be added                                                                          |
| need sensitivity analysis.                                                                                                                                                                                                                                                                                                                                                                                                                                                                                                       | Since we are now shortening the latter half of the paper, we will be adding sensitivity analyses in. |
| while I agree, your analysis has not demonstrated this                                                                                                                                                                                                                                                                                                                                                                                                                                                                           | We propose to remove this from this paper and keeping only the main hydrology argument.              |
